# Supplementary material
Source: PubMed Central journal article supplement (PMC9589192)
Supplement: mmc1.pdf [file mmc1.pdf]

## **Supplemental information**

### **Biparatopic nanobodies targeting the receptor**

### **binding domain efficiently neutralize SARS-CoV-2**

**Phillip Pymm, Samuel J. Redmond, Olan Dolezal, Francesca Mordant, Ester Lopez, James P. Cooney, Kathryn C. Davidson, Ebene R. Haycroft, Chee Wah Tan, Rebecca Seneviratna, Samantha L. Grimley, Damian F.J. Purcell, Stephen J. Kent, Adam K. Wheatley, Lin-Fa Wang, Andrew Leis, Alisa Glukhova, Marc Pellegrini, Amy W. Chung, Kanta Subbarao, Adam P. Uldrich, Wai-Hong Tham, Dale I. Godfrey, and Nicholas A. Gherardin**

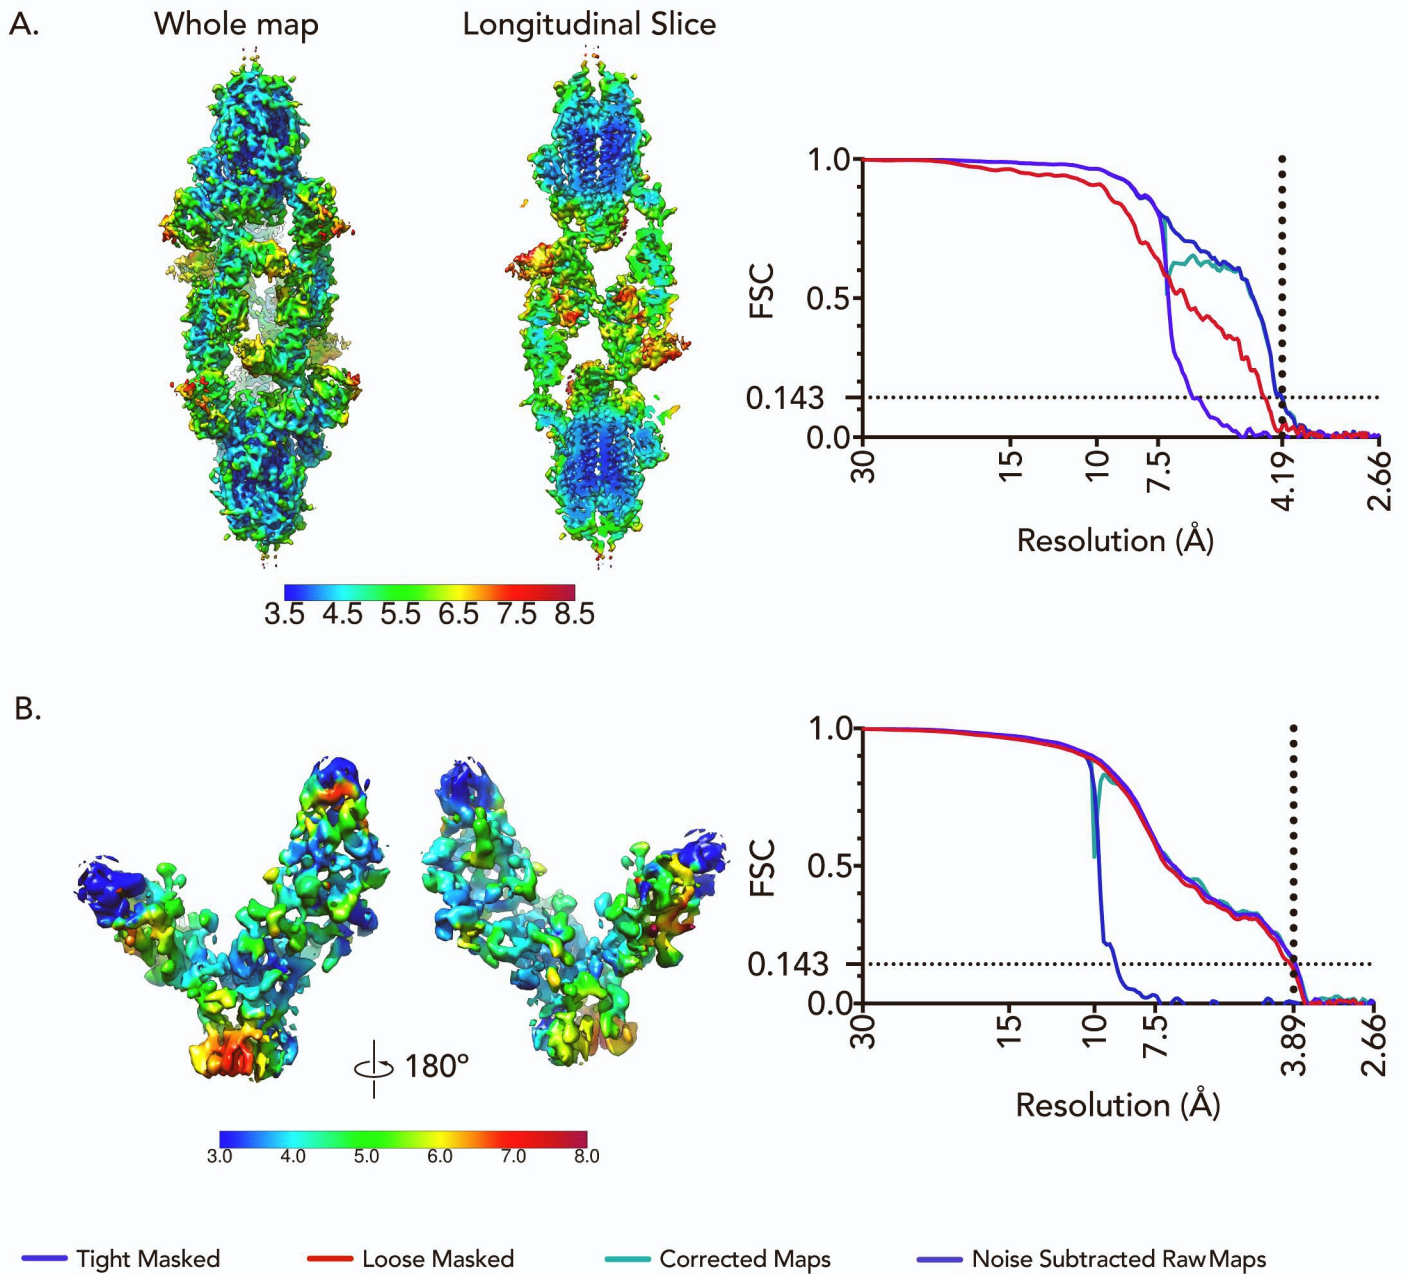

Figure S1. Cryo-EM maps coloured by local resolution of the S-BP10 complex, related to Figure 4. A. Best global refinement of the Spike-BP10 complex B. Best local refinement of a single copy of the RBD with density for two nanobodies. Highest resolution areas are coloured blue and lowest resolution areas are colored deep red. Scales and FSC curves are shown for each map. See also Figure 4.

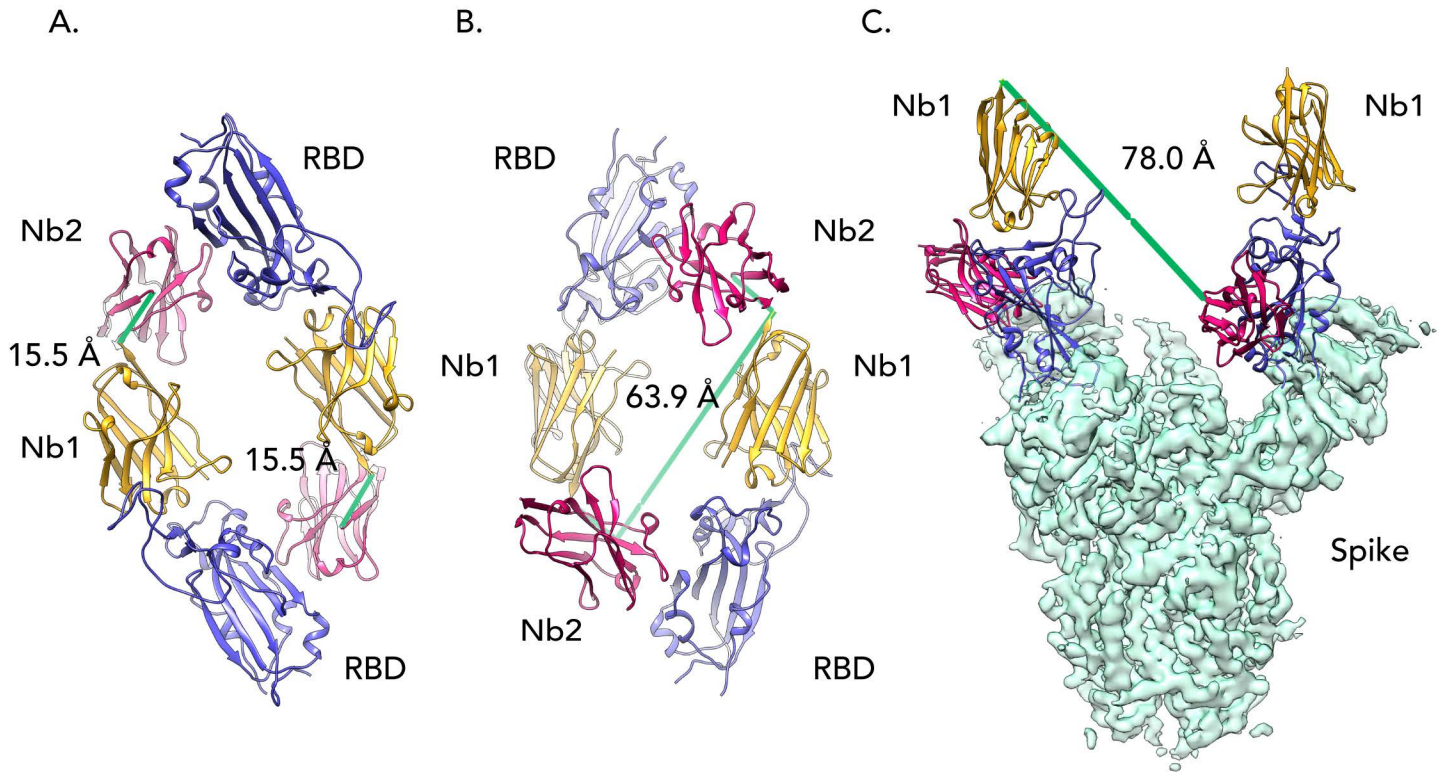

Figure S2. Linker length requirements for connecting nanobodies in the S-BP10 complex, related to figure 4. Cryo-EM maps of the BP10-spike complex showing spike (green), RBDs (purple-blue, PDB ID: 7LX5) and Nanobodies 1 (gold, PDB ID: 7KKK) and 2 (pink, PDB ID: 5IMK) distance measurements are coloured bright green. A. Distance between Nanobody 1 C-terminus and nanobody 2 N-terminus linking RBD's from different copies of Spike. B. Distance between Nanobody 1 C-terminus and nanobody 2 N-terminus on the same RBD. C. Distance between Nanobody 1 C-terminus and nanobody 2 N-terminus on adjacent RBD's on the same copy of Spike. See also Figure 4.

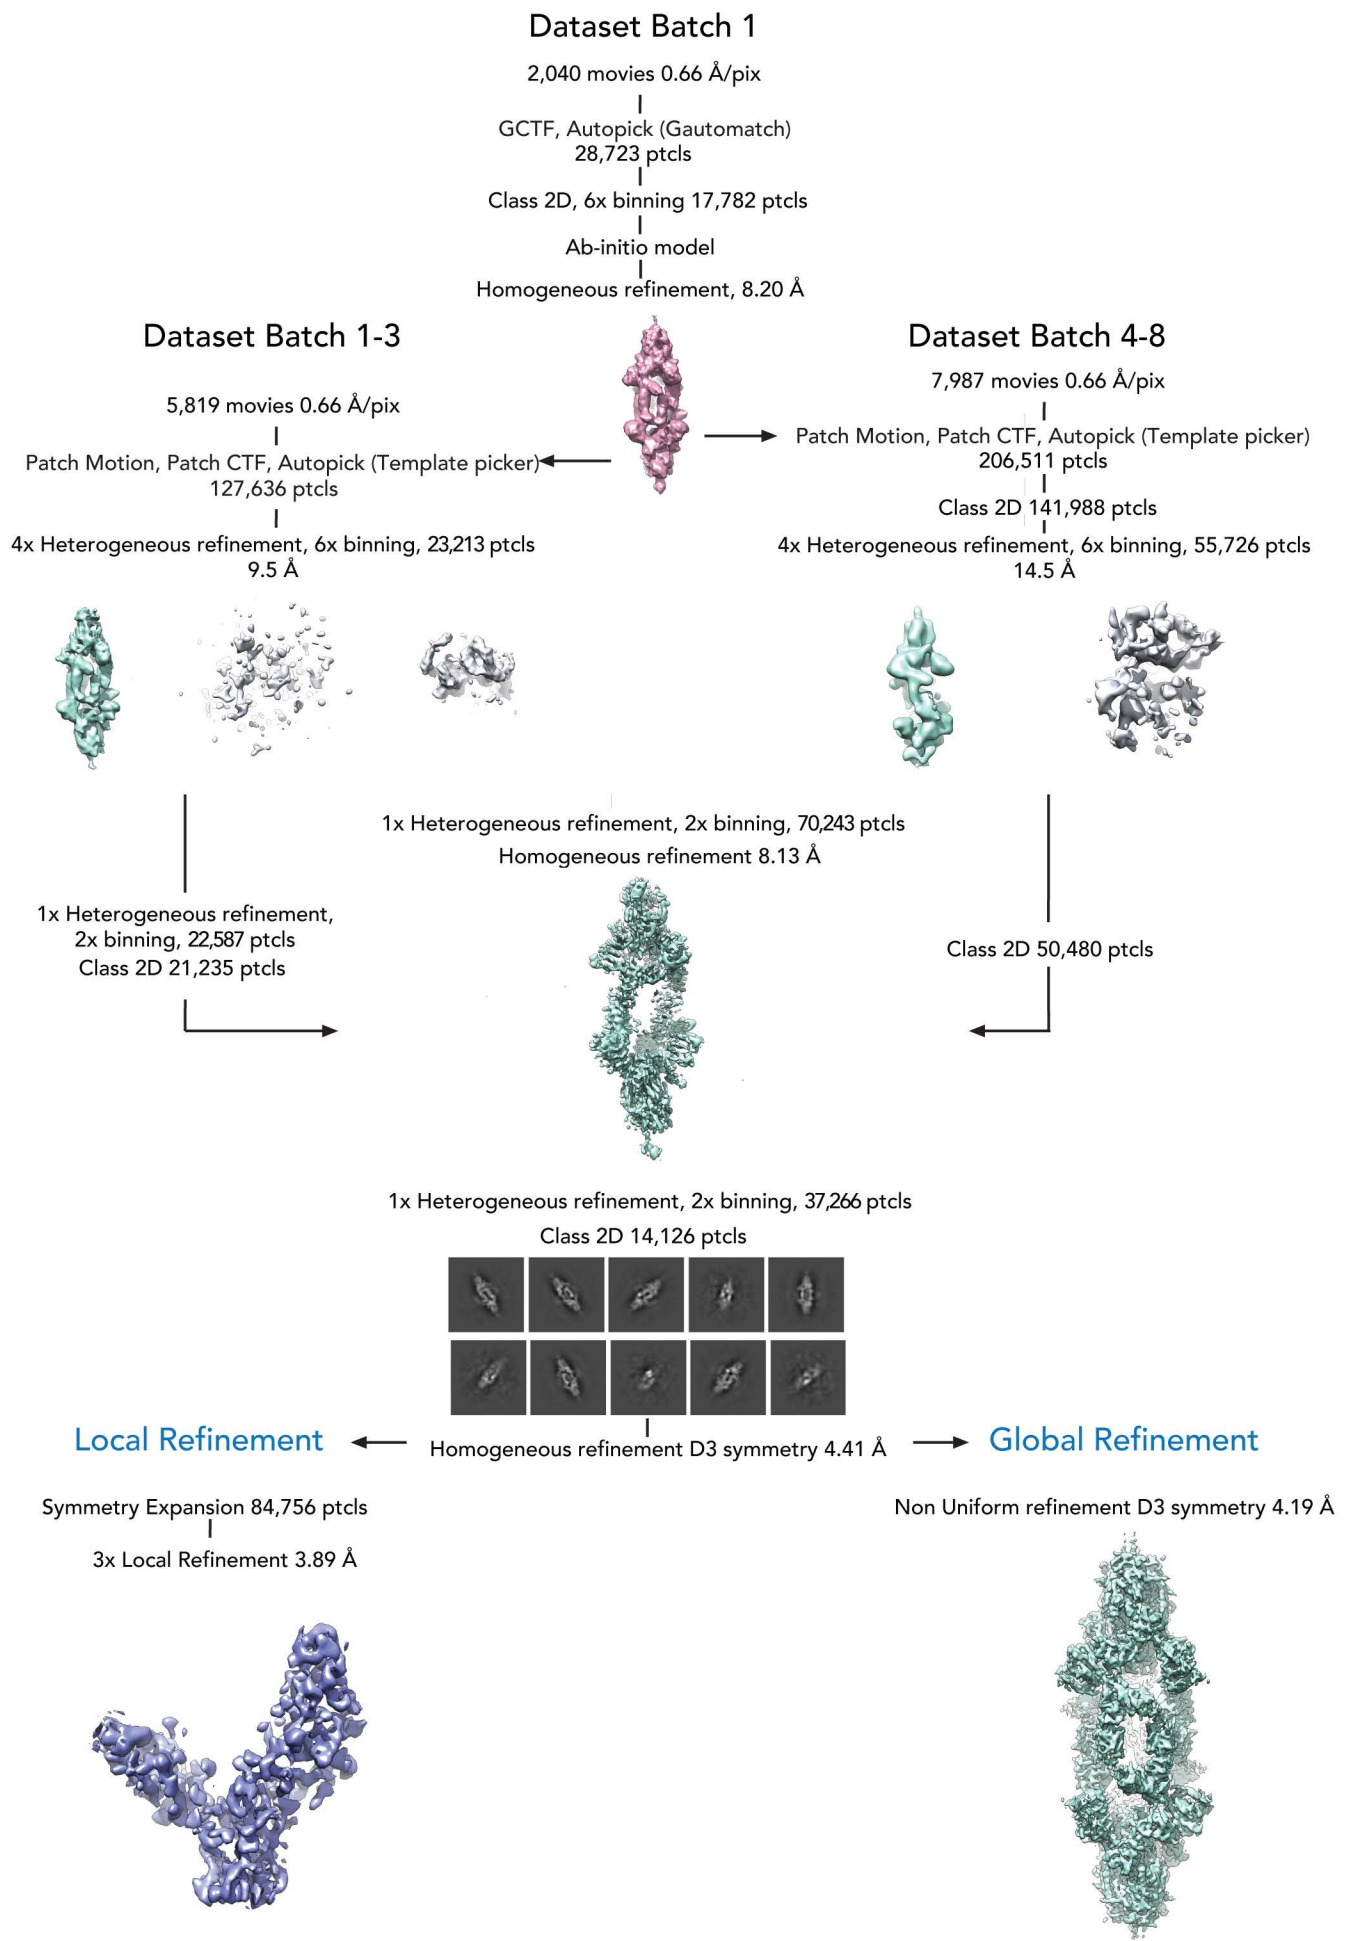

Figure S3. Cryo-EM data processing workflow for the S-BP10 complex, related to Figure 4. Details of workflow are fully described in materials and methods. See also Figure 4.

|                         |                                                                                  |     |
|-------------------------|----------------------------------------------------------------------------------|-----|
| SARS-CoV-2              | RVQPTEIVRFPNITNLCPFGEVFNATRFASVYAWNRRKRISNCVADYSVLVNSASFSTFKCYGVSPTKLNDLCFTNVYAD | 80  |
| SARS-CoV-2 Alpha        | .....                                                                            | 80  |
| SARS-CoV-2 Delta        | .....                                                                            | 80  |
| SARS-CoV-2 Lambda       | .....                                                                            | 80  |
| SARS-CoV-2 Beta         | .....                                                                            | 80  |
| SARS-CoV-2 gamma        | .....                                                                            | 80  |
| SARS-CoV-2 Delta plus   | .....                                                                            | 80  |
| SARS-CoV-2 Mu           | .....K.....                                                                      | 80  |
| Bat CoV BANAL-52        | .....T.....T.....                                                                | 80  |
| Pangolin CoV GD-1       | .....T.....T.....                                                                | 80  |
| Bat CoV BANAL-236       | .....D.....T.....                                                                | 80  |
| SARS-CoV-2 Omicron BA.1 | .....D.....D.....L.P.F.....                                                      | 80  |
| SARS-CoV-2 Omicron BA.2 | .....D.....D.....F.P.FA.....                                                     | 80  |
| Bat CoV RaTG13          | .....D.....T.....T.....                                                          | 80  |
| Pangolin CoV GX-P5L     | .....I.....SK.....T.....                                                         | 80  |
| Bat CoV WIV-1           | ..A.SKEV.....T.P.....E.....T.....A.....S.....                                    | 80  |
| Bat CoV RsSHC014        | ..A.SKEV.....T.P.....E.....I.....T.....A.....S.....                              | 80  |
| Bat CoV Rs2018B         | ..A.SKEV.....T.P.....E.....T.....A.....S.....                                    | 80  |
| Bat CoV LYRa11          | ..S.SKEV.....T.P.....E.....T.....AI.....S.....                                   | 80  |
| SARS-CoV-1              | ..V.SGDV.....K.P.....E..K.....TF.....A.....S.....                                | 80  |
|                         |                                                                                  |     |
| SARS-CoV-2              | SFVIRGDEVRQIAPGQTGKIADYNYKLPDDFTGCVIAWNSNNLDSKVGNGNYLYRLFRKSNLKPFERDISTEIQAGST   | 160 |
| SARS-CoV-2 Alpha        | .....                                                                            | 160 |
| SARS-CoV-2 Delta        | .....R.....K                                                                     | 160 |
| SARS-CoV-2 Lambda       | .....R.....                                                                      | 160 |
| SARS-CoV-2 Beta         | .....N.....                                                                      | 160 |
| SARS-CoV-2 gamma        | .....T.....                                                                      | 160 |
| SARS-CoV-2 Delta plus   | .....N.....R.....K                                                               | 160 |
| SARS-CoV-2 Mu           | .....                                                                            | 160 |
| Bat CoV BANAL-52        | ..V.....                                                                         | 160 |
| Pangolin CoV GD-1       | ..V.....R.....                                                                   | 160 |
| Bat CoV BANAL-236       | ..V.....                                                                         | 160 |
| SARS-CoV-2 Omicron BA.1 | .....N.....K.....S.....NK                                                        | 160 |
| SARS-CoV-2 Omicron BA.2 | .....N..S.....N.....K.....NK                                                     | 160 |
| Bat CoV RaTG13          | .....T.....KHI.A.E..F.....A.....K                                                | 160 |
| Pangolin CoV GX-P5L     | ..VK.....V.....VKQ.ALT..G.....K.....                                             | 160 |
| Bat CoV WIV-1           | ..VK..D.....V.....L...TR.I.ATQT...K..SL.HGK.R.....NVPFSPDGK                      | 160 |
| Bat CoV RsSHC014        | ..VK..D.....V.....L...L...T.SK..STS.....WV.R.K.N.Y..L.ND..SP.GQ                  | 160 |
| Bat CoV Rs2018B         | ..VK..D.....V.....M...L...TR.I.ATST...K..SL.HGK.R.....NVPFSPDGK                  | 160 |
| Bat CoV LYRa11          | ..VK..D.....V.....M...L...TR.I.ATSS..F..K..SL.HGK.R.....NVPFSPDGK                | 160 |
| SARS-CoV-1              | ..VK..D.....V.....M...L...TR.I.ATST...K..YL.HGK.R.....NVPFSPDGK                  | 160 |
|                         |                                                                                  |     |
| SARS-CoV-2              | PCNGVEGFNCYFPLQSYGFQPTNGVGYQPYRVVVLSEFLLHAPATVCGPKKSTNLVKNKCVNF                  | 223 |
| SARS-CoV-2 Alpha        | .....Y.....                                                                      | 223 |
| SARS-CoV-2 Delta        | .....                                                                            | 223 |
| SARS-CoV-2 Lambda       | .....S.....                                                                      | 223 |
| SARS-CoV-2 Beta         | .....K.....Y.....                                                                | 223 |
| SARS-CoV-2 gamma        | .....K.....Y.....                                                                | 223 |
| SARS-CoV-2 Delta plus   | .....                                                                            | 223 |
| SARS-CoV-2 Mu           | .....K.....Y.....                                                                | 223 |
| Bat CoV BANAL-52        | .....H.....N.....I.....                                                          | 223 |
| Pangolin CoV GD-1       | .....H.....N.....Q.....                                                          | 223 |
| Bat CoV BANAL-236       | .....K...H.....N.....I.....                                                      | 223 |
| SARS-CoV-2 Omicron BA.1 | .....A.....R..S.R..Y..H.....                                                     | 223 |
| SARS-CoV-2 Omicron BA.2 | .....A.....R.....R..Y..H.....                                                    | 223 |
| Bat CoV RaTG13          | .....QT.L...Y..YR..Y..D...H.....N.....                                           | 223 |
| Pangolin CoV GX-P5L     | ...QV.L...Y..ER..H..T..N..F.....NG.....L..T..D.....                              | 223 |
| Bat CoV WIV-1           | ..TP-PA...W..ND..YI..I.....N.....L..D.I..Q...                                    | 222 |
| Bat CoV RsSHC014        | S.SA-V.P...N..RP..FT.A..H.....N.....L..D.I..Q...                                 | 222 |
| Bat CoV Rs2018B         | ..TP-PA...W..ND..FT..I.....N.....L..D.I..Q...                                    | 222 |
| Bat CoV LYRa11          | ..TP-PA...W..ND..YT..I.....N.....L..D.IT.Q...                                    | 222 |
| SARS-CoV-1              | ..TP-PAL...W..ND..YT.T.I.....N.....L..D.I..Q...                                  | 222 |

Figure S4. Amino acid sequence alignment of RBD variants used in sVNT assay, related to Figure 5.

Table S1. List of RBD mutants used in the alanine-scan assay, related to Figure 5.

|    | Mutation |    | Mutation |
|----|----------|----|----------|
| 1  | L335A    | 34 | T449A    |
| 2  | G339A    | 35 | N450A    |
| 3  | N354A    | 36 | L452A    |
| 4  | E324A    | 37 | L455A    |
| 5  | S359A    | 38 | F456A    |
| 6  | S366A    | 39 | K458A    |
| 7  | V367A    | 40 | S459A    |
| 8  | Y369A    | 41 | N460A    |
| 9  | A372S    | 42 | K462A    |
| 10 | S375A    | 43 | P463A    |
| 11 | S383A    | 44 | S477A    |
| 12 | P384A    | 45 | T478A    |
| 13 | T385A    | 46 | E484A    |
| 14 | K386A    | 47 | F486A    |
| 15 | N388A    | 48 | F490A    |
| 16 | D389A    | 49 | Q493A    |
| 17 | L390A    | 50 | S494A    |
| 18 | F392A    | 51 | G496A    |
| 19 | T393A    | 52 | Q498A    |
| 20 | N394A    | 53 | T500A    |
| 21 | D405A    | 54 | N501A    |
| 22 | R408A    | 55 | G502A    |
| 23 | Q414A    | 56 | V503A    |
| 24 | D427A    | 57 | G504A    |
| 25 | I434A    | 58 | Y505A    |
| 26 | A435S    | 59 | S514A    |
| 27 | N439A    | 60 | L517A    |
| 28 | N440A    | 61 | L518A    |
| 29 | L441A    | 62 | H519A    |
| 30 | S433A    | 63 | A520S    |
| 31 | K444A    | 64 | P521A    |
| 32 | V445A    | 65 | A522A    |
| 33 | G446A    | 66 | P527A    |

Table S2. Cryo-EM data collection, refinement and validation statistics, related to Figure 4.

|                                        | Best Entire Spike-BP10 Complex<br>(EMDB-28189) | RBD+BP10-Nb1+Nb2<br>(localized reconstruction)<br>(EMDB-28190) |
|----------------------------------------|------------------------------------------------|----------------------------------------------------------------|
| <b>Data collection and processing</b>  |                                                |                                                                |
| Magnification                          | 155K                                           | 155K                                                           |
| Voltage (kV)                           | 300 keV                                        | 300 keV                                                        |
| Electron exposure (e-/Å <sup>2</sup> ) | 1.25                                           | 1.25                                                           |
| Defocus range (µm)                     |                                                |                                                                |
| Pixel size (Å)                         | 0.66                                           | 0.66                                                           |
| Symmetry imposed                       | D3                                             | C1                                                             |
| Initial particle images (no.)          | 334,147                                        | 334,147                                                        |
| Final particle images (no.)            | 14,126                                         | 84,756 (symmetry expanded)                                     |
| Map resolution (Å)                     | 4.19                                           | 3.89                                                           |
| FSC threshold                          | 0.143                                          | 0.143                                                          |
| Map resolution range (Å)               | 2.9-12.8                                       | 2.9-10.6                                                       |
